# Supplementary figures and images for: Systems analysis of metabolism in the pathogenic trypanosomatid Leishmania major
Source: PubMed Central journal article supplement — Mol Syst Biol. 2008 Mar 25;4:177. doi: 10.1038/msb.2008.15 (PMC2290936; doi:10.1038/msb.2008.15), 2008-03-25

# Leishmania major Metabolic Network

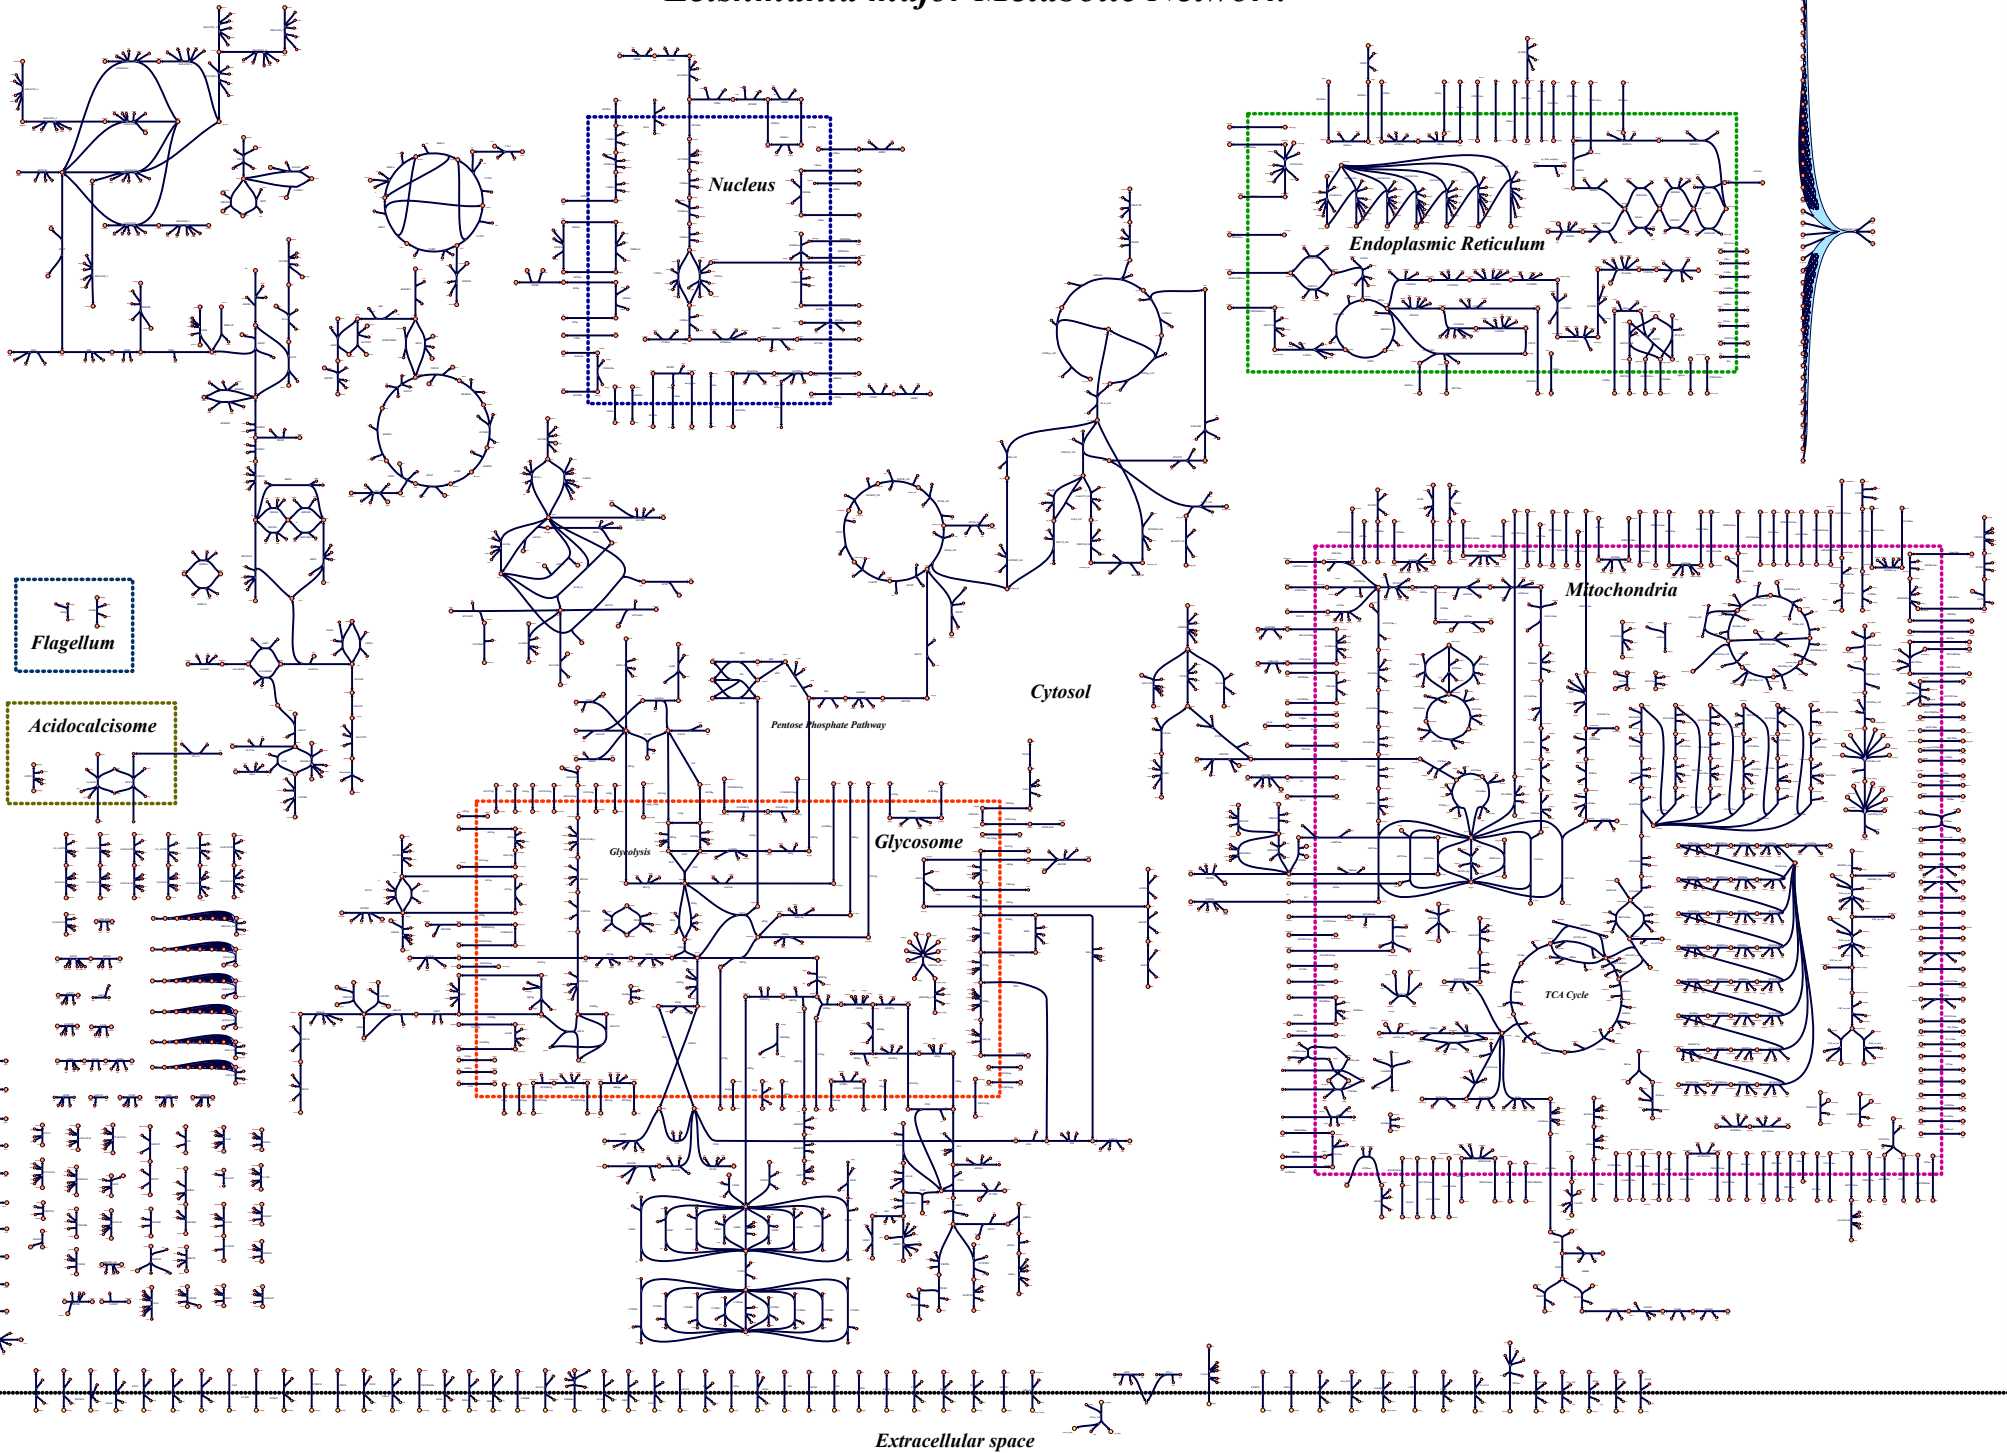

Supplement: msb200815-s5.pdf [file msb200815-s5.pdf]
